# Supplementary material for: The Metamolecular Predictive Method of Exceptional Point and Quasi-Bound State In the Continuum
Source: Research Square preprint supplement (doi:10.21203/rs.3.rs-6212153/v1), 2025-04-21
Supplement: Supplementary file 1 [file 34f5d8821b0d9e8beb625d0c.docx]

**Supporting Information for “The Metamolecular Predictive Method of Exceptional Point and Quasi-Bound State In the Continuum”**

**CONTENTS**

**S1. Mathematical modeling of meta-atoms**

To predict the metamolecular structural parameters of exceptional point (EP) metamolecules and quasi-bound states in the continuum (QBIC), it is essential to first model the meta-atom. We analyze the Jones matrix equation for a half-wave plate device within a linearly polarized basis.

|  | (S.1) |
| --- | --- |

Rectangular meta-atoms can be considered as a type of half-wave plate. The meta-atoms Jones matrix is denoted as:

|  | (S.2) |
| --- | --- |

Where denotes the transmission factor, and lets , not , be due to the fact that . , , and represent meta-atoms transmission, long-axis phase, and long-axis to short-axis phase difference (), respectively. To simulate a half-wave plate, define the phase constant . Eq. (S.2) is simplified as:

|  | (S.3) |
| --- | --- |

Where denotes transmission, the first subscript indicates the polarization state of the incident light, and the second subscript indicates the polarization state of the outgoing light. For example, , denotes the transmittance of x-polarized incoming light and y-polarized outgoing light. The meta-atoms are geometrically rotated, and the matrices are spatially transformed according to the Parity-Time symmetry theory.

|  | (S.4) |
| --- | --- |

Where denotes the rotation matrix, and a matrix operation on Eq. (S.4) yields.

|  | (S.5) |
| --- | --- |

Substituting the analytic equations ,, and , Eq. (S.5) splits into co-polarized part and cross-polarized part.

|  | |
| --- | --- |
|  | (S.6) |

In the Jones matrix calculation, the relationship between the circularly polarized basis and the linearly polarized basis:

|  | (S.7) |
| --- | --- |

Where r denotes right-handed circular polarization (RCP) and l denotes left-handed circular polarization (LCP). Since our theory is based on the analysis of circularly polarized light, transforming Eq. (S.6) into a circularly polarized basis yields the Jones matrix as

|  | |
| --- | --- |
|  | (S.8) |

As shown in Eq. (S.8), the transmission of meta-atoms can be solved using , and in Figs. S1 (a-c). The transmission of the meta-atoms is analyzed using the Finite-Difference Time-Domain method (FDTD), and the simulation results are consistent with the calculation results, as shown in Figs. S1 (d) and (e).


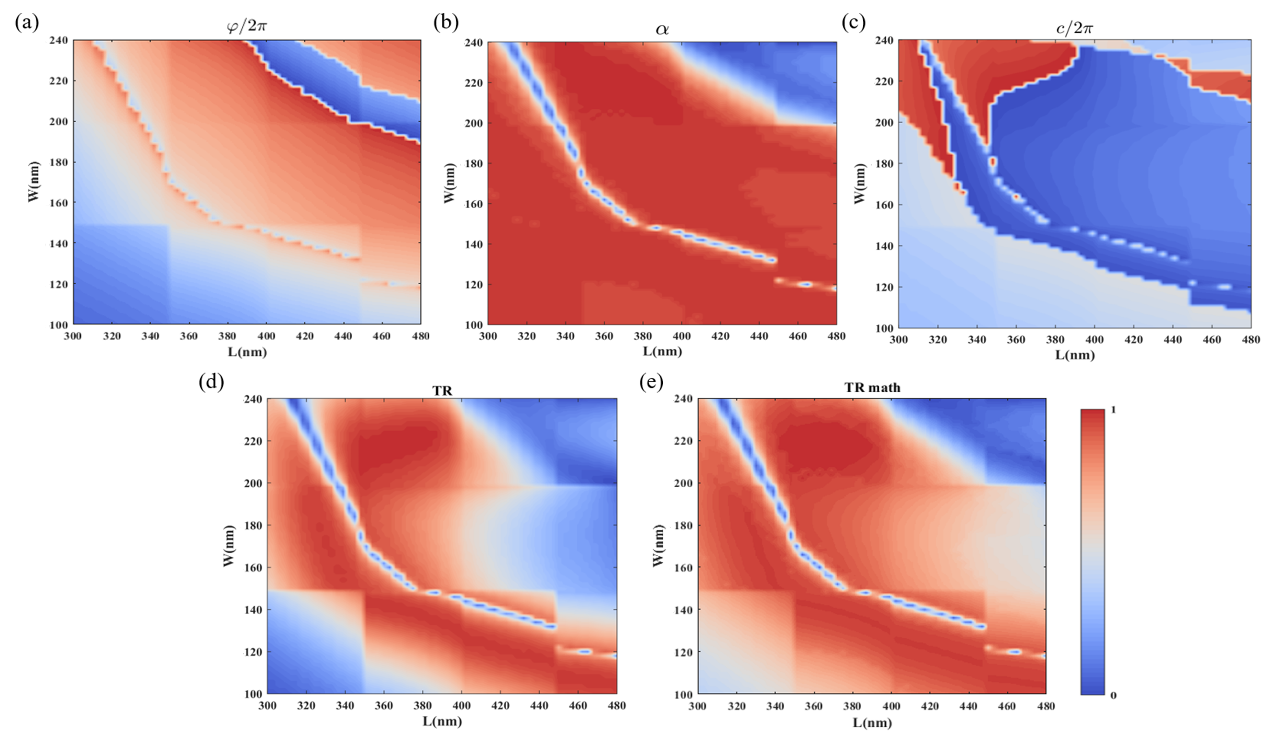


**Figure S1.** Optical parameters corresponding to the meta-atom. (a), (b), and (c) represent the normalized long-axis phase , the normalized transmission of meta-atoms , and the normalized phase constant . (d) The meta-atom transmission. (e) Valuable calculation of meta-atoms transmission. The calculated value and the simulation are generally consistent.

**S2. Mathematical modeling of metamolecules**

**S2.1 Cross-polarized Jones matrix**

The outgoing energy of the metamolecule is divided into co-polarization and cross-polarization components for independent analysis. First, the cross-polarized energy is examined, with the meta-atoms A1 and A2 represented by the following mathematical models.

|  | (S.9) |
| --- | --- |

Based on the interference theory, the total transmission of metamolecules can be expressed as . The cross-polarized energy Jones matrix for metamolecules can be derived from Eq. (S.9) as:

|  | (S.10) |
| --- | --- |

Where

|  |  |
| --- | --- |

Simplify

|  |  |
| --- | --- |

Here M denotes variables related to the optical properties of meta-atoms. Based on the Jones matrix, we can obtain equations and for calculating the metamolecules transmission. First, the metamolecular left-handed polarization equation is derived from Eq. (S.10) as

|  | (S.11) |
| --- | --- |

Considering the special case and , Eq. (S.11) is derived as

|  | |
| --- | --- |
|  | (S.12) |

Where . We should note that the conclusion does not need to strictly adhere to the special case. Therefore, the cross-polarized portion of LCP light can be approximated as

|  |  |
| --- | --- |

Similarly, the cross-polarized light transmission incident can be obtained as

|  |  |
| --- | --- |

where . Assuming that meta-atoms are perfect half-wave plates, then and . We need the transmissions of metamolecules to satisfy conditions and , so meta-atoms need to meet certain criteria that and . Metamolecules are LCP-sensitive EP when meta-atoms P1 and P2 satisfy and .

**S2.2 Co-polarized Jones matrix**

From Eq. (S.8), the co-polarization energy is not affected by the rotation angle . Now, we analyze the co-polarization Jones matrix of metamolecules as

|  | (S.13) |
| --- | --- |

The co-polarized energy Jones matrix for metamolecules can be derived from Eq. (S.13) as

|  | (S.14) |
| --- | --- |

To simplify the equation, let , to obtain the approximation matrix as

|  | (S.15) |
| --- | --- |

Where co-polarized phase constant .

**S2.2 Simplified equation**

In summary, the transmission intensity of the metamolecule can be expressed as , where each parameter is represented by:

(S.16)

Where , , and.To simplify the design difficulty, the parameters of the two meta-atoms are set to and , and the Eq. (S.15) is further simplified to:

(S.17)

When and , Eq. (S.16) simplifies to:

(S.18)

Depending on the library of meta-atoms, different equations can be used for metamolecule calculations.

**S3. The metamolecules of EP and QBIC**

This section utilizes the library of meta-atoms to predict the metamolecular theoretical parameters of LCP light-sensitive EP (M1), RCP light-sensitive EP (M2), and LCP light-sensitive QBIC (M3). The predicted structural data are presented in Table 1; these are theoretical structures that require further scanning to minimize errors. Regarding the metamolecule of EP, our primary focus is on the cross-polarized zeros in various polarized light conditions, thus we do not take into account its co-polarized light transmission characteristics. According to Eq. (S.18), pick the meta-atom that satisfies , , , or . For M1, substituting the data from Tab. S1 into Eq. (S.16) yields: Trl = 0.63; Tlr = 0.10. According to Eq. (S.17), pick the meta-atom that satisfies , , , or . For M2, substituting the data from Tab. S1 into Eq. (S.16) yields: Trl = 0.07; Tlr = 0.26. For the metamolecule of QBIC, both the co-polarized and cross-polarized components of his different polarized light have an effect on his formation, so we need to consider the transmission states of all polarized light. According to Eq. (S.17), pick the meta-atom that satisfies , , , or . For M3, substituting the data from Tab. S1 into Eq. (S.16) yields: Trr = Tll = 0.02; Trl = 0.87; Tlr = 0.08.

**Table S1.** Table of metamolecular theoretical parameters of EP andQBIC

|  |  | L(nm) | W(nm) | (%) | c(rad) | (rad) |
| --- | --- | --- | --- | --- | --- | --- |
| M1 | A1 | 381 | 196 | 97 | 0.31 | 4.71 |
| A2 | 399 | 116 | 97 | 2.82 | 2.24 |
| M2 | A1 | 420 | 220 | 58 | 0.58 | 0.33 |
| A2 | 435 | 134 | 73 | 0.63 | 4.3 |
| M3 | A1 | 336 | 180 | 94 | 0.17 | 3.73 |
| A2 | 411 | 118 | 97 | 3 | 2.62 |

The theoretical structures are scanned for reducing errors. The scope and complement of the scans are shown in Tab. S2.

**Table S2.** Table of scanning range and step information

|  |  | (nm) | Step(nm) | (nm) | Step(nm) |
| --- | --- | --- | --- | --- | --- |
| M1 | A1 | 370-420 | 1 | 190-215 | 0.5 |
| A2 | 365-405 | 1 | 96-116 | 0.5 |
| M2 | A1 | 400-440 | 1 | 210-230 | 0.5 |
| A2 | 420-450 | 1 | 127-142 | 0.5 |
| M3 | A1 | 320-350 | 1 | 172-157 | 0.5 |
| A2 | 402-417 | 0.5 | 110-125 | 0.5 |

The structural data for M1, M2, and M3, derived from the scanned results, are presented in Table S3. The findings indicate that M1 is characterized by Tlr = 0, M2 by Trl = 0, and M3 by Tll = Trr = 0. Theoretical analysis suggests that M1 or M2 may occasionally appear on the same scanning plane as M3; however, they do not coincide at overlapping points, allowing for the distinction of the two zeros based on the nature of the topological phase. If both M1 and M2 were to appear at the same point, it would indicate a BIC point; however, achieving this in a four-atom structure with a rotation angle poses significant challenges.

**Table S3.** Table of metamolecular adjusted parameters of EP and QBIC.

|  |  | L(nm) | W(nm) | Tll(Trr) | Tlr | Trl |
| --- | --- | --- | --- | --- | --- | --- |
| M1 | A1 | 392 | 201 | 0.37(0.30) | 0 | 0.39 |
| A2 | 390 | 108.5 |
| M2 | A1 | 420 | 220 | 0.14(0.17) | 0.34 | 0 |
| A2 | 430 | 132 |
| M3 | A1 | 336 | 180 | 0(0) | 0.15 | 0.97 |
| A2 | 411 | 119 |

The metamolecule of QBIC demonstrates strong binding capabilities in both electric and magnetic fields, as illustrated in Fig. S2(a-d). Given that the majority of the electric and magnetic fields are localized within the meta-atoms, with only a minimal portion spilling over, QBIC exhibits weak coupling between the meta-atoms.


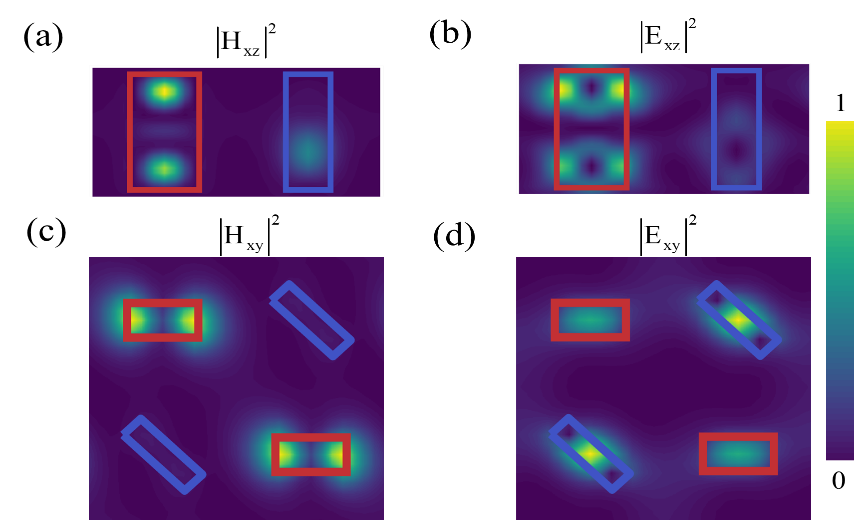


**Figure S2.** Magnetic field and electromagnetic distribution of M3. (a) and (b) are the magnetic field and the electromagnetic field in the x-z direction. (c) and (d) are the magnetic field and the electromagnetic field in the x-y direction.
